# Supplementary material for: Remarkable crystal phase effect of Cu/TiO2catalysts on the selective hydrogenation of dimethyl oxalate
Source: Royal Society of Chemistry journal article supplement (doi:10.1039/c5ra00053j), 2015-01-01
Supplement: c5ra00053j1.pdf [file c5ra00053j1.pdf]

## Electronic Supporting Information (ESI)

### Remarkable crystal phase effect of Cu/TiO<sub>2</sub> catalysts on the selective hydrogenation of dimethyl oxalate

Bin Wang, Chao Wen, Yuanyuan Cui, Xi Chen, Yu Dong and Wei-Lin Dai

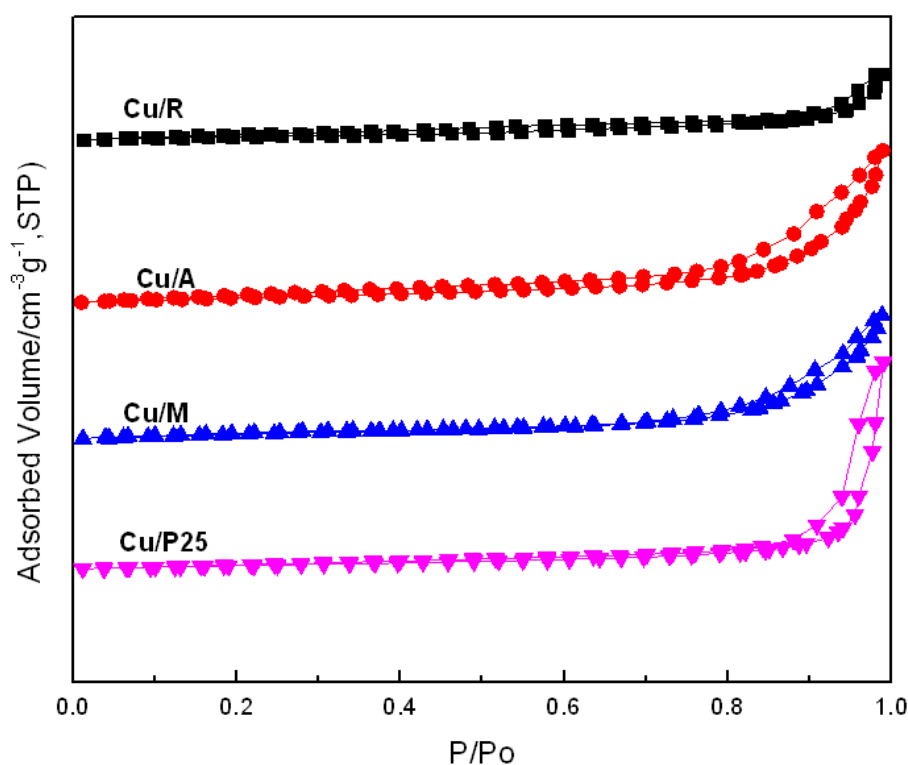

Fig. S1 N<sub>2</sub> adsorption isotherms of the calcined catalysts with different morphology of titania supports.

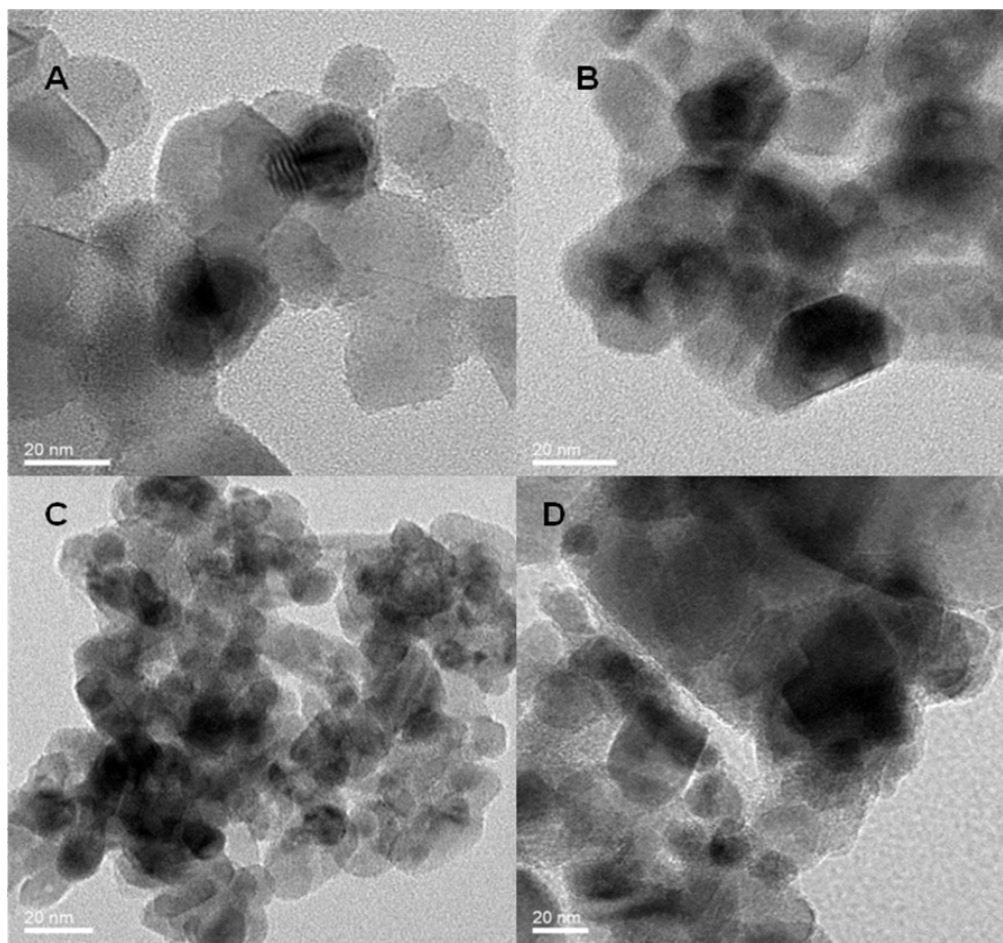

Fig. S2 TEM images for the reduced catalysts (A) Cu/P25; (B) Cu/M; (C) Cu/A; (D) Cu/R, all samples were pre-treated in  $H_2$  in 573 K for 4 h.

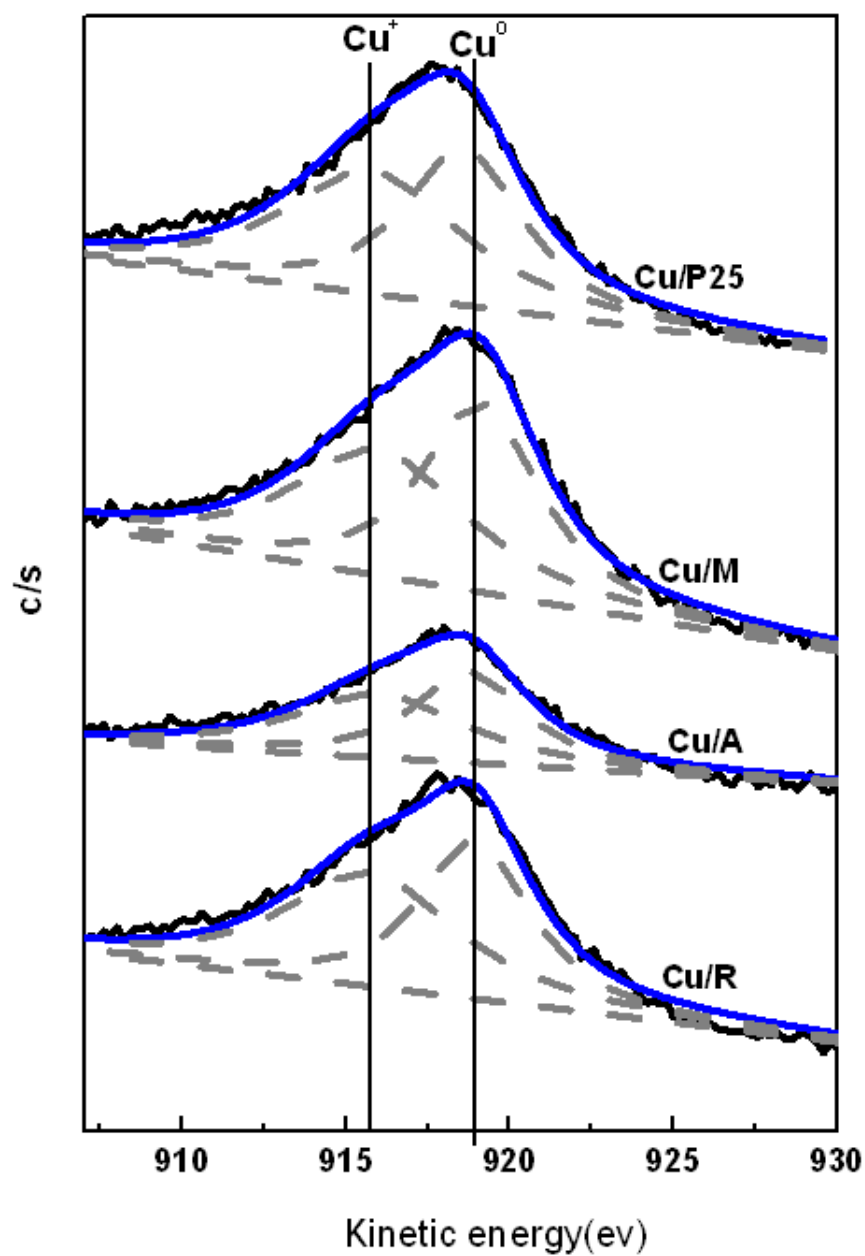

Fig. S3 Cu LMM X-ray induced Auger spectra (XAES) of Cu/TiO<sub>2</sub> catalysts.

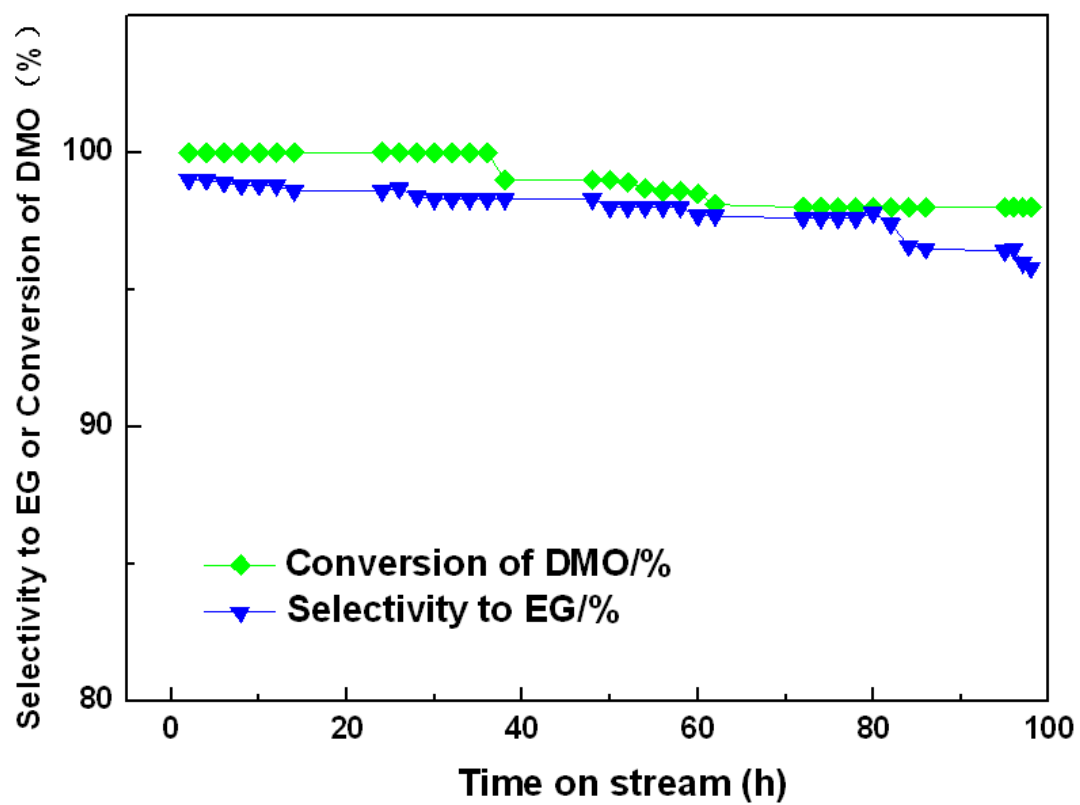

Fig. S4 Stability test of Cu/P25, Reaction condition:  $P = 2.5$  MPa,  $T = 493$  K,  $H_2/DMO = 100$  (mol/mol),  $LHSV = 0.3$  h<sup>-1</sup>.
